# **A modeling framework for translating discrete choice experiment results into cost-effectiveness estimates: an application to designing tailored and scalable HIV and contraceptive services for adolescents in South Africa**

Caroline Govathson<sup>1</sup>, Lawrence C Long<sup>1,2</sup>, Colin A Russell<sup>2,3</sup>, Aneesa Moolla<sup>1</sup>, Sophie Pascoe<sup>1</sup>, Brooke E. Nichols<sup>1,2,3§</sup>,

<sup>1</sup> Health Economics and Epidemiology Research Office, Faculty of Health Sciences, University of the Witwatersrand

<sup>2</sup> Department of Global Health, Boston University School of Public Health, Boston, MA, USA

<sup>3</sup> Department of Medical Microbiology, Amsterdam University Medical Center, Amsterdam, the Netherlands

§ Corresponding author: Brooke Nichols [brooken@bu.edu](mailto:brooken@bu.edu)

801 Massachusetts Ave.,  
Crosstown Center, 3<sup>rd</sup> Floor  
Boston, MA, USA 02118  
+1 857 544 7250  
[brooken@bu.edu](mailto:brooken@bu.edu)

E-mail addresses of authors:

CG: [cgovathson@heroza.org](mailto:cgovathson@heroza.org)

LCL: [lclong@bu.edu](mailto:lclong@bu.edu)

AM: [amoolla@heroza.org](mailto:amoolla@heroza.org)

SP: [spascoe@heroza.org](mailto:spascoe@heroza.org)

BEN: [brooken@bu.edu](mailto:brooken@bu.edu)

CAR: [c.a.russell@amsterdamumc.nl](mailto:c.a.russell@amsterdamumc.nl)

Keywords: Discrete choice experiment; health economics; modelling; HIV; adolescents

Word count:

Abstract: 349/350

Main text: 3312/3500

## 1 **Abstract**

2 **Background:** Youth in South Africa are disproportionately affected by STIs, HIV, and  
3 unintended pregnancies. Despite this, their uptake of HIV and contraceptive services remains a  
4 challenge. South Africa urgently needs tailored, scalable interventions to address both HIV  
5 infection and early pregnancy prevention for young people. These interventions generally take  
6 years to design, implement, and evaluate, leaving a gap. To that end, we have developed a  
7 framework to translate the expected impact of facility-level attributes in increasing  
8 HIV/contraceptive service uptake for youth from a discrete choice experiment (DCE) into a cost  
9 effectiveness analysis (CEA).

10 **Methods:** We used a DCE (n=805) conducted in Gauteng, South Africa, which found that staff  
11 attitude, confidentiality, Wi-Fi, subsidized food, afternoon hours and youth-only services were  
12 preferred attributes of health services. Based on this we simulated uptake of services adapted for  
13 these preferences. We divided preferences into modifiable attributes that could readily be  
14 adapted (e.g. Wi-Fi), and non-modifiable (more nuanced attributes that are more challenging to  
15 cost and evaluate): staff attitude and estimated the incremental change in uptake of services using  
16 adapted services. Costs for modifiable preferences were estimated using data from two clinics in  
17 South Africa (2019 US\$). We determined the incremental cost effectiveness ratio (ICER) of 15  
18 intervention combinations, and report the results of interventions on the cost-effectiveness  
19 frontier.

20

21 **Results:** Greatest projected impact on uptake was from friendly and confidential services, both  
22 of which were considered non-modifiable (18.5% 95%CI:13.0-24.0%; 8.4% 95%CI:3.0-14.0%  
23 respectively). Modifiable factors on their own resulted in only small increases in expected  
24 uptake. (Food: 2.3% 95%CI:4.0%-9.00%; Wi-Fi: 3.0% 95%CI: -4.0%-10.0%; Youth only  
25 services: 0.3% 95%CI: -6.0%-7.0%; Afternoon services: 0.8% 95%CI: -6.0%-7.0%). The order  
26 of interventions on the cost-effectiveness frontier are Wi-Fi and youth-only services (ICER  
27 US\$7.01- US\$9.78), Wi-Fi, youth-only services and food (ICER US\$9.32 - US\$10.45), followed  
28 by Wi-Fi, youth-only services and extended afternoon hours (ICER US\$14.46 – US\$43.63)

29 **Conclusion:** Combining DCE results and costing analyses within a modelling framework  
30 provides an innovative way to inform decisions on effective resource utilisation. Modifiable  
31 preferences, such as Wi-Fi provision, youth only services and subsidized food, have potential to  
32 cost-effectively increase the proportion of youth accessing HIV and contraceptive services.

### 33 **Introduction**

34 Existing models of care have failed to adequately address the gap in sexual health needs, access  
35 to- and uptake of- HIV and contraceptive services among adolescents in South Africa (1). The  
36 rate of unintended pregnancy among adolescents remains high, with about a quarter of  
37 adolescent girls and young women (AWYG) giving birth before age 20 (2)(3). According to  
38 UNAIDS, the incidence rate for HIV infection among adolescents aged 10-19 was 54 per 1000  
39 population in 2018 in South Africa with adolescent girls disproportionately affected(4). Despite  
40 the high prevalence of HIV and pregnancy among adolescents, uptake of HIV and contraceptive  
41 services in this age group remains a challenge. The 2016 South African demographic health  
42 survey revealed that 31% of girls aged 15-19 years and 28% of AGYW aged 20-24 years had  
43 unmet contraceptive needs(5). This underscores a critical need to increase adolescent access to  
44 both HIV and contraceptive services.

45  
46 Many solutions have been offered to increase uptake of HIV and contraceptive services by  
47 adolescents including “youth friendly clinics” and school health programs with limited success  
48 (1,6,7). Children 12 years and older have the right to reproductive health, including access to  
49 contraceptives and HIV/AIDS testing without consent of a parent or guardian (8). There however  
50 remain many barriers to adolescents' access and uptake of reproductive health services (9–11).  
51 South Africa urgently needs tailored, scalable interventions to address both HIV infection and  
52 early pregnancy prevention for young people, in particular for young women. Decisions on how  
53 to tailor and efficiently scale interventions with regards to cost and uptake are often difficult to  
54 make due to limited data on youth preferences, impact and cost of different interventions.

55  
56 Discrete choice experiments (DCE's) are a study design increasingly used in health economics to  
57 explore the relative importance of different attributes that may influence decision to access and

58 utilize certain goods, services or programs (12,13). They can be used to understand whether  
59 particular attributes can predict uptake of services and the relative importance of certain  
60 attributes to this uptake (14). The results from a DCE can help policy makers understand the  
61 impact of making certain changes to current services on service acceptability or uptake. Recent  
62 research has been conducted to determine the preferences of school going youth for HIV and  
63 contraceptive services through the use of a DCE(15). Key service characteristics including staff  
64 attitude, confidentiality and value-added services like availability of Wi-Fi, food and youth-only  
65 waiting areas were found to be key attributes affecting the decision to access care. The cost and  
66 expected effectiveness of altering these key attributes to improve the likelihood that the youth  
67 access health services is, however, unknown.

68  
69 When designing interventions using preference data from a DCE, information on incremental  
70 uptake and how much it costs to implement these interventions is essential(16,17). This  
71 information allows us to compare the different interventions and select only the most cost-  
72 effective, scalable interventions for trialing. Traditionally trial data, stakeholder opinions,  
73 observational data of comparable scenarios are used with some underlying assumptions to  
74 predict uptake and cost(16–19) In our work we describe an approach that can be used to close the  
75 gap between the DCE methodology and implementation or trialing of different targeted  
76 programs.

77  
78 In order to guide future trials or implementation, we used the results of the DCE with school  
79 going youth (15) to model the expected costs and impact (in terms of increase in the proportion  
80 of youth accessing health services) of attributes of health services. We used coefficients of  
81 expected uptake of HIV and contraceptive services from a recently conducted DCE (20), as an  
82 estimated outcome measure as part of a cost-effectiveness analysis. This information can be used  
83 to determine which interventions or combination of interventions should take priority within  
84 limited budgets.

85

## 86 **Methods**

87 This work builds on a discrete choice experiment (DCE) that was conducted to estimate  
88 preferences of school going adolescents for accessing HIV and contraceptive services(15). The  
89 DCE was conducted in 10 high schools situated in neighbourhoods of varying socio-economic  
90 status (SES) in Gauteng South Africa between 07/2018-09/2019 (**Figure 1**). A total of 805  
91 students completed the survey for the adolescent DCE study. Over two thirds (68%) of the  
92 participants were female, and two-thirds (66%) of the students who participated were aged 15-17  
93 years. Details of the DCE will be published elsewhere.

94 From the above study, six factors were found to be facilitators for uptake of HIV and  
95 contraceptive services (15). These were the six attributes and levels that showed significant  
96 change in probability of a choice being selected. Staff attitude and confidentiality were key  
97 issues affecting students' decisions to access HIV and contraceptive services. Access to  
98 subsidized food, youth-only waiting areas, afternoon services and presence of free Wi-Fi were  
99 the other preferences that were significantly associated with choice in the DCE. We used these  
100 results to identify combinations of interventions that could be used to increase uptake of HIV and  
101 contraceptive services by youths. The attributes were categorised into modifiable (easier to  
102 implement, and to cost and evaluate): subsidized food, Wi-Fi, youth-only services and afternoon  
103 services (after school hours); and non-modifiable (more nuanced attributes that are more  
104 challenging to cost and evaluate): friendliness and confidentiality. We looked at the potential  
105 increase in service uptake across the full set of mutually exclusive combinations of all six of  
106 these factors (Table 1). The complete cost-effectiveness analysis was, however, only done for the  
107 four factors that could be reasonably costed in a generalizable way. These four factors were  
108 placed into all possible combinations of between one and four attributes. This resulted in 15  
109 different modifiable mutually exclusive intervention combinations that could be evaluated to see  
110 if they are cost effective options.

111

112

113

114

115

116

117

118

119

120

121

122

123

124

125

126

127

128

129

130

131

132

133

134

135

### 136 Translation of DCE results to uptake

137

138

139

140

141

142

143

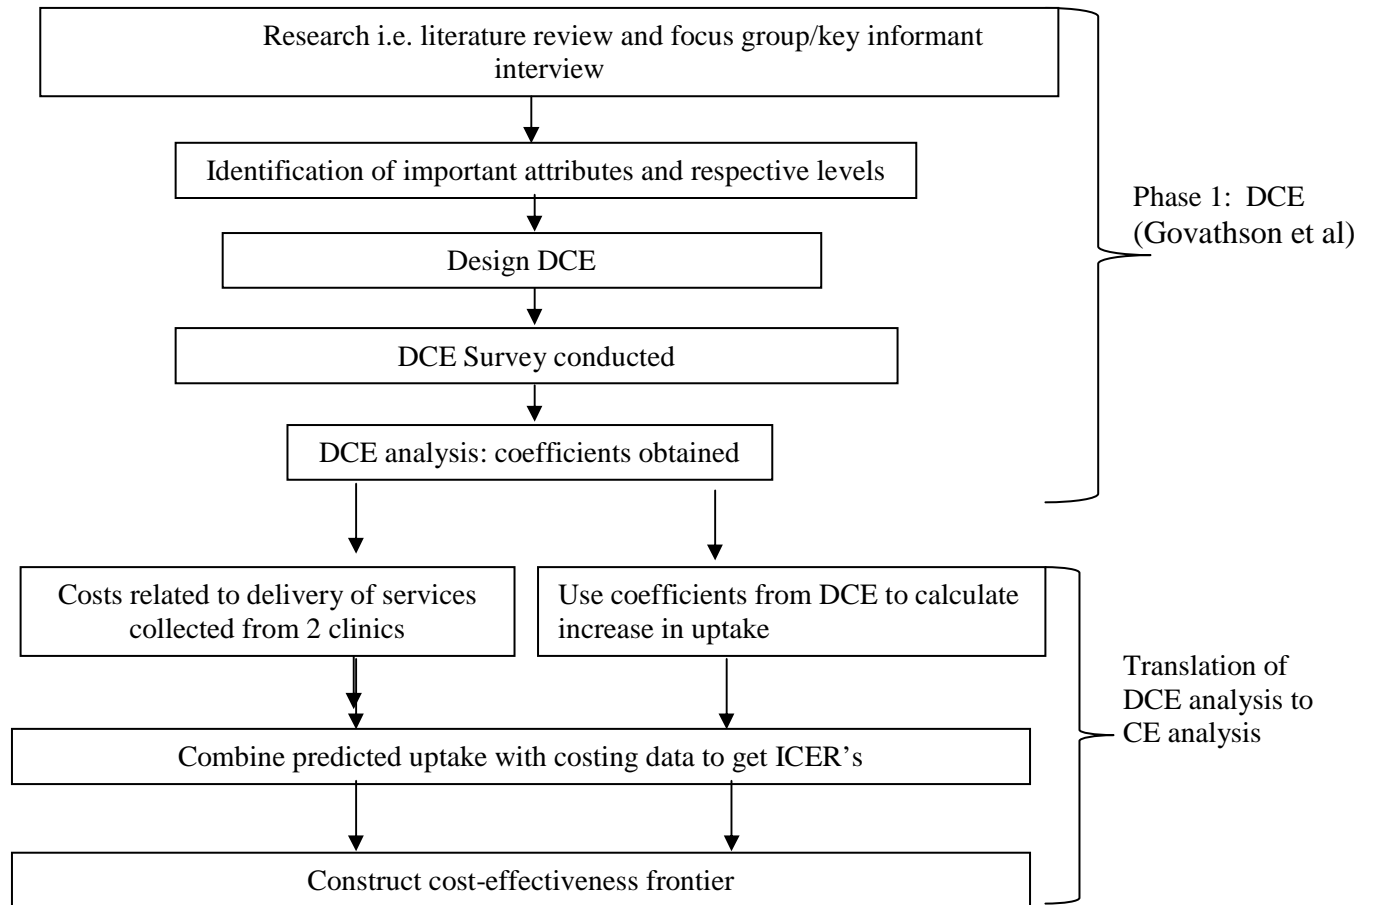

134 Figure 1: Translation of Discrete Choice Experiment results to cost-effectiveness results

### 136 Translation of DCE results to uptake

138 We used coefficients from the DCE (15) to estimate the expected increase in uptake of HIV and  
139 contraceptive services as the outcome measure for a cost-effectiveness analysis. We defined the  
140 baseline to be the set of attributes that most closely reflects current practice (Location: clinic,  
141 time: morning, staff attitude: unfriendly, confidentiality: none, incentives: none and provision of  
142 all health services). To estimate uptake of services, we calculated change of probability of uptake  
143 of using services from baseline levels when changes are made to the next level of each attribute

144 (i.e. the incremental change in uptake). We modelled attributes, which had shown a statistically  
145 significant effect on the probability of an attribute being chosen in the DCE.

146

147 The logit probability of choosing alternative i rather than alternative j is given by the equation:

148

$$149 \quad P_i = \frac{e^{\beta' x_i}}{149 \quad \sum e^{\beta' x_j}}$$

150

151  
152  
153 Using this equation (21), the change in the probability of choosing to use HIV and contraceptive  
154 services given the baseline levels say, clinic, and morning services is then (provided all other  
155 attributes remain equal) given by the above equation.

156

## 157 **Costs**

158

159 Costs related to the delivery of a modified package of clinic interventions delivered with the aim  
160 of increasing the utilization of HIV and contraceptive services were estimated from a health  
161 system perspective.

162

163 Baseline costs were estimated from cost data collected from two clinics ( one government  
164 primary health clinic and one South African non-profit organization providing Comprehensive  
165 PHC services with DOH support) through an external study focused on the costing of primary  
166 health services (22,23). The methods for the costing and the description of these primary health  
167 clinics are elsewhere (22–24). For each of the intervention scenarios, only the additional costs  
168 associated with the modification were calculated. The additional costs associated with the  
169 modification were shared among the additional adolescent patients expected to utilize the clinic  
170 following the changes.

171

172 The changes in cost in categories of assets, overheads, staff (clinical and non-clinical) and  
173 supplies for each package of interventions were calculated based on a number of assumptions  
174 regarding how these service modifications would be implemented and current local costs of  
175 implementing those changes. We used available cost analysis data and published data on  
176 interventions that have been implemented(23,25,26). All costs for the interventions were

177 allocated to the additional adolescent patients and therefore division of total additional costs was  
178 by the number of extra adolescent patients.

179  
180 Utilities such as electricity, water and sewage costs were allocated based on the total number of  
181 monthly visits. Staff costs for the afternoon and for youth only services were calculated based on  
182 number of patients seen and period of time the facility would be open in the afternoon. Food  
183 costs were calculated for all adolescents but the total cost was billed only to the additional  
184 adolescent patients so that the incremental cost included the cost of food to all adolescents. Extra  
185 space for youth-only services or afternoon services was calculated using average size counselling  
186 rooms.

187 We calculated a cost per additional adolescent patient expected to utilize HIV and contraceptive  
188 services as a consequence of the clinic modifications, as well as the total costs required at the  
189 facility level to implement the intervention. All costs were updated to 2019 South African Rand  
190 (ZAR) and converted to USD using the mid-year exchange rate 1 USD = 14 ZAR (27). Analysis  
191 of costs was done using Microsoft Excel.

192

### 193 **Cost-effectiveness ratios**

194

195 In order to generate incremental cost-effectiveness ratios, the predicted probability analysis was  
196 combined with costing data for selected intervention scenarios. All intervention scenario costs  
197 and their respective expected effectiveness were incremental from a baseline cost and  
198 effectiveness of zero (e.g. no clinic modifications). We compared the new strategies  
199 (Intervention B) and the cost and outcome of these against the baseline standard of care  
200 (Intervention A) (i.e.  $\text{Cost of Intervention B} - \text{Cost of intervention A} / (\text{Effectiveness of}$   
201  $\text{intervention B} - \text{Effectiveness of intervention A})$ )(28). Those strategies that cost more and did  
202 not increase uptake of services were considered ‘dominated’ (e.g. costlier and less or equally  
203 effective) and therefore removed from the comparison. When the intervention increased the  
204 uptake of the services and was also less costly, we called it the “dominant” intervention. For  
205 interventions that increased uptake and also the cost, an ICER was calculated to compare the  
206 interventions, or a cost per additional youth expected to access services. To determine the most  
207 cost-effective strategies we used the efficiency frontier approach. A cost-effectiveness frontier



208 representing the efficient combination of interventions of the 15 strategies assessed was  
209 constructed. Interventions below the frontier are not considered cost-effective at any  
210 threshold(29).

211 In the incremental analysis, strategies were compared until ultimately, only the most cost-  
212 effective strategies were left and these were ordered according to their cost-effectiveness ratio,  
213 lowest to highest, referencing which strategies should be adopted in incremental order dependent  
214 on the availability of resources(28,29). In order to determine how sensitive our results were to  
215 the specific costs at an individual clinic, we repeated the above analysis for two different clinics  
216 and their respective costs.

## 217 **Ethics**

218 As this was a modelling study based on results from published studies that did not involve  
219 human subjects, approval from an institutional review board was not necessary.

## 220 **Results**

### 221 **Preferences (Results from the DCE)**

222

223 Results from the DCE that informed this work showed that the most preferred service  
224 characteristics that facilitated HIV and contraceptive service uptake by adolescents were friendly  
225 health care providers and private and confidential services. Students preferred accessing services  
226 in the afternoon (after school hours) compared to the morning. Youth only services, Wi-Fi and  
227 access to food were likely to increase the probability of students utilising services. Students  
228 preferred the more comprehensive package of services (family planning and contraceptive  
229 services) or all health services as opposed to services that only provided condoms or HIV  
230 counselling and Testing (HCT) (20)

231

### 232 **Uptake projections**

233

234 The results from the simulations conducted here indicate that uptake of HIV and contraceptive  
235 services may increase as different service attributes are added to the baseline standard of care.

236 Non-modifiable/difficult to modify factors such as ensuring friendly healthcare providers and  
237 confidentiality of services were projected to have the largest impact on uptake (an increase of  
238 18.5%; (95%CI 13.0%-24.0%); and 8.4%; (95%CI 3.0%-14.0% respectively)). Combining these  
239 non-modifiable preferences with three modifiable preferences (Wi-Fi, food, youth only services  
240 and afternoon services) projected a statistically significant increase in uptake by 55.0% (95%CI  
241 46.0%-65.0%) from baseline (**Figure 2**).

242  
243 For the final cost-effectiveness analysis, only modifiable attributes were included. As individual  
244 interventions, provision of afternoon services, or youth friendly services or Wi-Fi only or food  
245 only did not yield a statistically significant increase in rates of uptake of services. The least  
246 effective strategy in terms of additional youth expected to use HIV and contraceptive services  
247 were, in ascending order of efficacy, youth only services, afternoon services, access to  
248 subsidized food and provision of Wi-Fi separately. The combination of all four attributes,  
249 however, (Wi-Fi, food, afternoon services and youth) provided the highest increase in uptake of  
250 23.0% (95%CI 11.0%-35.0%) (**Figure 3**). This was followed by different combinations of just  
251 three attributes which showed that uptake might be increased by roughly 17.0% for any  
252 combination of the three attributes (**Table 1**). Combining only two preferred modifiable  
253 attributes might also increase uptake by between 7.0% and 11.0% depending on combination of  
254 preferred attributes (**Table 1**). The number of adolescents utilising HIV and contraceptive  
255 services at baseline were higher at clinic B than at clinic A, therefore as a fraction, clinic A had  
256 more additional adolescents utilising services.

257

258

259

260

261

262

263

264

265

266

267  
268  
269  
270  
271  
272  
273  
274

**Table 1. Uptake of HIV and contraceptive services projections for intervention scenarios**

|                                                               | Coefficient | % usage increase from baseline | Standard error | P-value | Confidence Interval | Total % |
|---------------------------------------------------------------|-------------|--------------------------------|----------------|---------|---------------------|---------|
| Baseline                                                      |             |                                |                |         |                     | 30.6    |
| afternoon                                                     | 0.01        | 0.82                           | 0.03           | 0.80    | -5.62 – 7.27        | 31.42   |
| Wi-Fi                                                         | 0.03        | 2.71                           | 0.04           | 0.45    | -4.25 – 9.67        | 33.31   |
| Youth waiting area                                            | 0.00        | 0.29                           | 0.03           | 0.93    | -6.17 – 6.74        | 30.89   |
| Food                                                          | 0.02        | 2.25                           | 0.03           | 0.49    | -4.10 – 8.61        | 32.85   |
| Friendly                                                      | 0.19        | 18.54                          | 0.03           | 0.00    | 13.44 – 23.63       | 49.14   |
| Confidential                                                  | 0.08        | 8.35                           | 0.03           | 0.00    | 3.09 – 13.60        | 38.95   |
| Wi-Fi and Food                                                | 0.11        | 10.70                          | 0.05           | 0.03    | 10.00 – 20.00       | 41.30   |
| Food and youth                                                | 0.08        | 8.30                           | 0.04           | 0.06    | 0.00 – 16.00        | 38.90   |
| Youth and Wi-Fi                                               | 0.09        | 9.00                           |                | 0.07    | 0.00 – 18.00        | 39.60   |
| Afternoon and Wi-Fi                                           | 0.09        | 9.00                           | 0.04           | 0.02    | 1.20 – 17.00        | 39.60   |
| Afternoon and youth only                                      | 0.07        | 6.90                           | 0.04           | 0.08    | -0.87 – 14.67       | 37.50   |
| Food and afternoon                                            | 0.08        | 8.00                           | 0.03           | 0.02    | 1.20 – 16.40        | 38.60   |
| Youth only, afternoon and Wi-Fi                               | 0.17        | 16.84                          | 0.06           | 0.01    | 4.59 – 29.08        | 47.44   |
| Wi-Fi food and youth                                          | 0.17        | 16.70                          | 0.06           | 0.01    | 4.50 – 28.80        | 47.30   |
| Wi-Fi, food, afternoon                                        | 0.17        | 17.20                          | 0.05           | 0.00    | 6.90 – 27.48        | 47.80   |
| Food, afternoon and youth                                     | 0.15        | 14.80                          | 0.05           | 0.00    | 5.48 – 24.24        | 45.40   |
| Wi-Fi, food, afternoon, youth                                 | 0.23        | 23.00                          | 3.65           | 0.00    | 10.60 – 35.00       | 53.60   |
| Youth only, Wi-Fi, afternoon, friendly                        | 0.49        | 49.42                          | 0.04           | 0.00    | 40.86 – 57.99       | 80.02   |
| Youth only, fifi, afternoon, friendly                         | 0.38        | 37.99                          | 0.05           | 0.00    | 28.60 – 47.38       | 68.59   |
| Youth only, Wi-Fi, Food, afternoon, friendly, confidentiality | 0.55        | 55.00                          | 0.05           | 0.00    | 46.00 – 65.00       | 85.60   |

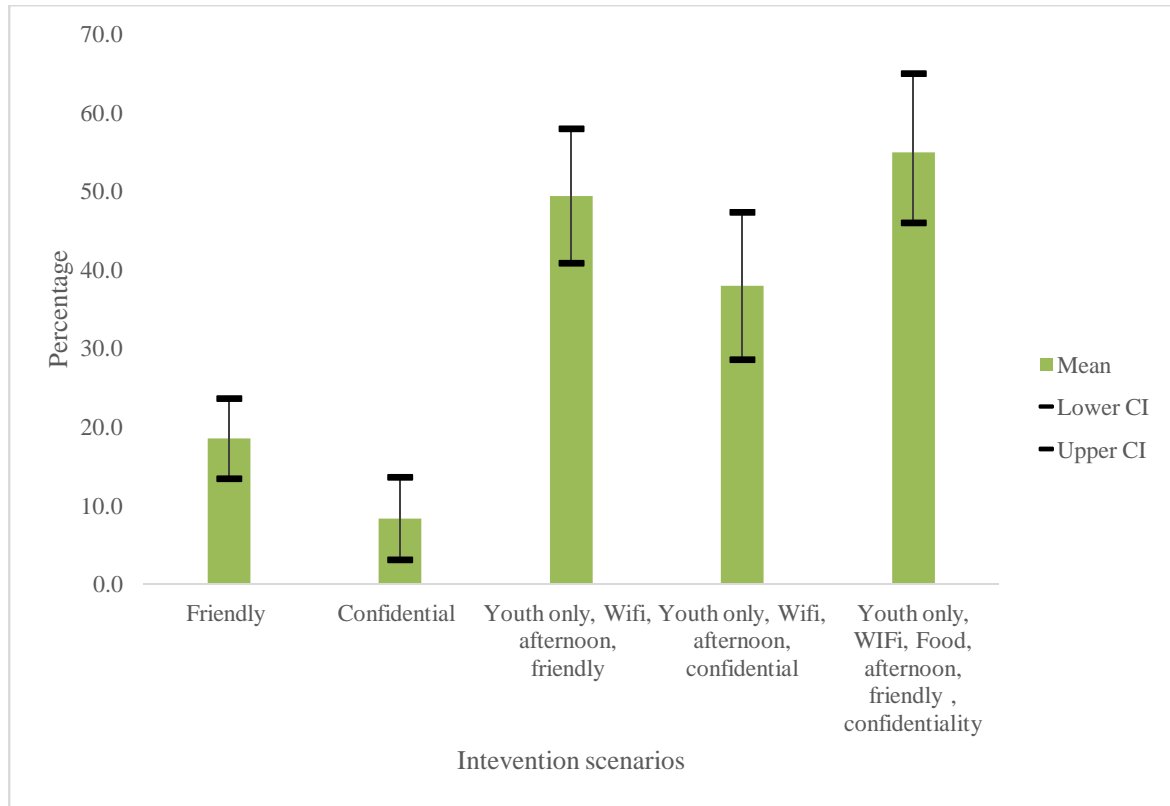

275

276 **Figure 2: Uptake of HIV and contraceptive services projections for scenarios that include at least one non-modifiable**  
277 **attribute**

278

279

280

281

282

283

284

285

286

287

288

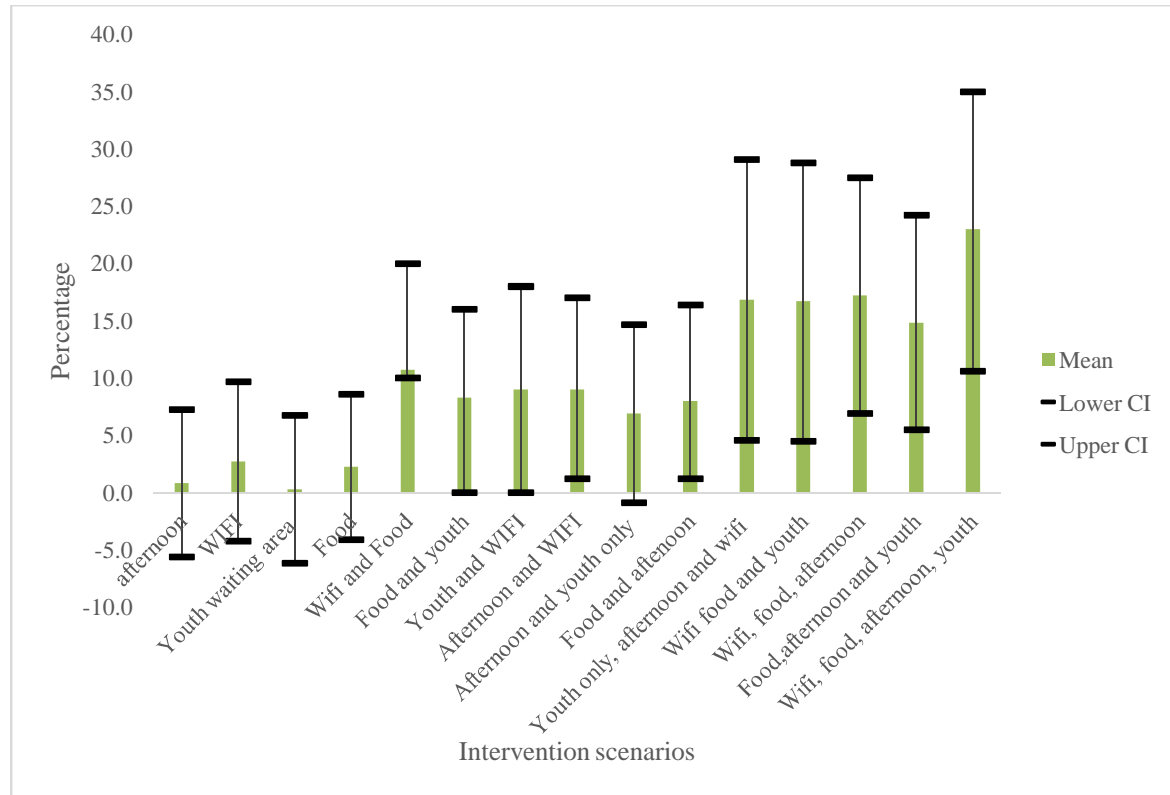

289

290 **Figure 3: Uptake of HIV and contraceptive services projections for modifiable intervention scenarios**

291

292 **Cost and cost-effectiveness**

293 The cost per additional adolescent utilising services varied between the clinics depending on  
 294 which interventions or package of interventions might be implemented. Clinic A costs ranged  
 295 from \$10.20 to 202.90 (**Table 2**) and Clinic B from \$7.00 to \$116.50 for clinic B (**Table 3**).

296 The addition of subsidized food had the third highest cost per additional adolescent utilising HIV  
 297 and contraceptive services at US\$31.5 for clinic A and US\$30.8 for clinic B. This was because  
 298 we cost the food to benefit all adolescents utilising services but the cost would be borne only by  
 299 the additional youth utilising services. Provision of services in the afternoon outside school hours  
 300 has the next highest cost per additional adolescent utilising services (US\$78.5 per additional  
 301 adolescent at clinic A and US\$77.6 at clinic B). Providing youth only services would be the  
 302 costliest per additional youth accessing HIV and contraceptive services with costs for clinic A at  
 303 US\$202.9 and clinic B at US\$116.5. Combining all modifiable attributes was US\$19.20 for  
 304 clinic A and US\$9.76 for clinic B per additional adolescent utilising services.

305 **Figure 4** shows all non-dominated interventions scenarios for the two clinics, ranked in order of  
 306 decreasing cost effectiveness. The most value for money is gained by implementing the  
 307 interventions from the left to the right until the budget is exhausted (28). For both clinics, the  
 308 ICER for youth only services and Wi-Fi was the best. The ICER’s for clinic A range from  
 309 US\$9.78 for (Wi-Fi and youth only services) and US\$43.7 for a combination of all four  
 310 modifiable attributes. The same order is retained with regards to ICER’s for clinic B, though  
 311 with lower incremental costs- US\$7.01 for (WI-FI and youth only services) and US\$14.5 for all  
 312 four modifiable attributes combined.

313 **Table 2: Clinic A: Cost-effectiveness of interventions to increase youth uptake of HIV and contraceptive services**

| Number                             | Additional youths | New total youths | %    | Cost per patient | Total Cost | ICER             |
|------------------------------------|-------------------|------------------|------|------------------|------------|------------------|
| Wi-Fi                              | 41                | 1572             | 2.7  | \$12.6           | \$516.7    | Dominated        |
| youth only                         | 4                 | 1535             | 0.3  | \$202.9          | \$811.7    | Dominated        |
| afternoon                          | 13                | 1544             | 0.8  | \$78.5           | \$1,020.2  | Dominated        |
| Food                               | 34                | 1565             | 2.3  | \$31.5           | \$1,072.3  | Dominated        |
| Wi-Fi, youth only                  | 138               | 1669             | 9.0  | \$10.6           | \$1,465.6  | \$9.8            |
| Wi-Fi, food                        | 168               | 1699             | 10.7 | \$10.2           | \$1,706.0  | Weakly dominated |
| food, youth only                   | 122               | 1653             | 8.3  | \$15.2           | \$1,858.6  | Dominated        |
| Wi-Fi, afternoon                   | 142               | 1673             | 9.3  | \$18.3           | \$2,603.3  | Weakly dominated |
| Wi-Fi, food, youth only            | 260               | 1791             | 17   | \$10.5           | \$2,740.0  | \$10.5           |
| afternoon, youth only              | 106               | 1637             | 6.9  | \$27.0           | \$2,864.9  | Dominated        |
| Wi-Fi, afternoon, youth only       | 230               | 1761             | 17.0 | \$13.7           | \$3,147.3  | Dominated        |
| food, afternoon                    | 138               | 1669             | 9.0  | \$24.9           | \$3,442.0  | Dominated        |
| food, afternoon, youth only        | 230               | 1761             | 15.0 | \$18.1           | \$4,161.0  | Dominated        |
| Wi-Fi, food, afternoon             | 260               | 1791             | 17.0 | \$16.4           | \$4,251.4  | Dominated        |
| Wi-Fi, food, afternoon, youth only | 352               | 1883             | 23.0 | \$19.2           | \$6,758.1  | \$43.7           |

314

315

316

317

318

319

320 **Table 3: Clinic B: Cost-effectiveness of interventions to increase youth uptake of HIV and contraceptive services**

|                                    | Additional youths | Total youths | %    | Cost per patient | Total Cost | ICER             |
|------------------------------------|-------------------|--------------|------|------------------|------------|------------------|
| Wi-Fi                              | 49                | 1857         | 2.7  | \$10.6           | \$522.7    | Weakly dominated |
| youth only                         | 5                 | 1813         | 0.3  | \$116.5          | \$611.1    | Dominated        |
| Wi-Fi, youth only                  | 163               | 1971         | 9.0  | \$7.0            | \$1,141.9  | \$7.0            |
| afternoon                          | 15                | 1823         | 0.8  | \$77.6           | \$1,150.6  | Dominated        |
| Food                               | 41                | 1849         | 2.3  | \$30.8           | \$1,254.8  | Dominated        |
| food, youth only,                  | 145               | 1953         | 8.0  | \$11.4           | \$1,653.6  | Dominated        |
| afternoon, youth only              | 125               | 1933         | 6.9  | \$13.8           | \$1,721.0  | Dominated        |
| Wi-Fi, food                        | 199               | 2007         | 10.7 | \$9.0            | \$1,785.6  | Weakly dominated |
| Wi-Fi and afternoon                | 168               | 1976         | 9.3  | \$7.5            | \$1,253.7  | Dominated        |
| food, afternoon                    | 163               | 1971         | 9.0  | \$14.8           | \$2,413.4  | Dominated        |
| Wi-Fi, food, youth only            | 307               | 2115         | 17.0 | \$8.1            | \$2,490.5  | \$9.3            |
| Wi-Fi, afternoon, youth only       | 271               | 2079         | 15.0 | \$8.5            | \$2,293.3  | Dominated        |
| Wi-Fi, food, afternoon             | 307               | 2115         | 17.0 | \$12.7           | \$3,914.4  | Dominated        |
| food, afternoon, youth only        | 271               | 2079         | 15.0 | \$11.2           | \$3,026.0  | Dominated        |
| Wi-Fi, food, afternoon, youth only | 416               | 2224         | 23.0 | \$9.8            | \$4,059.7  | \$14.5           |

321

322

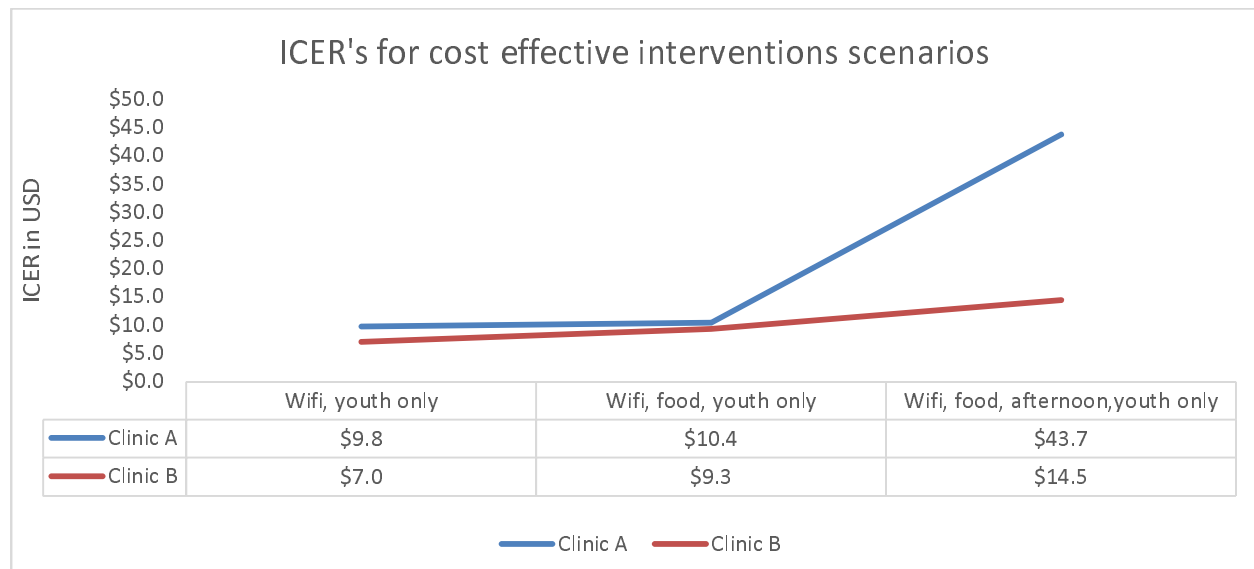

323

324 **Figure 4: Incremental cost-effectiveness ratios on the cost-effectiveness frontier**

325

326

## 327 **Discussion**

328

329 We have described a methodology to estimate cost-effectiveness of potential service delivery  
330 mechanisms- for HIV and contraceptive services for youth- utilising results of a discrete choice  
331 experiment. Typically, cost-effectiveness analyses only come at the end of costly and time-  
332 consuming trials or large-scale observational studies. This type of pre-intervention assessment of  
333 potential cost-effectiveness of a set of interventions based on the stated preferences of the target  
334 audience and an estimate of costs of each intervention can assist in guiding more efficient trial  
335 planning- such that only the arms that are expected to be on the cost-effectiveness frontier are  
336 included in a trial design. Results could also be used to directly guide programme planning and  
337 scale-up where appropriate. The strength and innovation of this study lies in the use of DCE data  
338 to calculate potential changes in uptake of services from the current standard of care if different  
339 interventions were implemented, and also the use of cost data from clinics to calculate  
340 incremental costs of adding interventions. The use of data from DCEs to make projections on  
341 uptake of services to inform cost effectiveness analysis is valuable for intervention trials where  
342 resources do not exist to do the trial and obtain actual uptake data (revealed preferences) (30–  
343 32).

344 The results from the first analysis applying this novel methodology were able to determine the  
345 set of non-dominated strategies for increasing uptake of services, and determine the order with  
346 which they should be implemented across the cost-effectiveness frontier.

347

348 Friendliness, privacy and confidentiality are among the strongest drivers of choice for use of  
349 HIV and contraceptive services among adolescents who participated in the DCE used in this  
350 approach. We stratified the preferences identified from the DCE into modifiable and non-  
351 modifiable preferences. Friendliness and confidentiality were considered non-modifiable  
352 preferences- meaning that interventions to address these preferences are currently not well-  
353 defined (and therefore not cost-able). The DCE results and uptake projections show, however,  
354 that the non-modifiable factors are the most impactful and would provide the biggest increase in  
355 uptake- if an intervention to address these factors could be well-defined and costed. Addressing  
356 staff attitudes with regards to friendliness and confidentiality is likely a cost-effective



357 strategy(33,34) as the impact is likely to go beyond just utilization of HIV and contraceptive  
358 services for adolescents into other health and educational outcomes (35,36).

359

360 The effectiveness of value-added services like access to free or affordable food, Wi-Fi and cash  
361 transfers has been evaluated before (7,34). Although cost-effective, it is important to be aware of  
362 their full impact and where this impact may plateau and new strategies must come in. Wi-Fi and  
363 youth-only services cost an incremental \$7.01 - \$10.62 per additional adolescents expected to  
364 access the healthcare facility but on their own are only expected to increase adolescent utilization  
365 of health services by 9%. Should resources allow, additional considerations would be, first: Wi-  
366 Fi and youth-only services, second: the addition of subsidized food and third: addition of  
367 afternoon clinic hours. Our results show that the order that we must implement interventions is  
368 the same between the two clinics and that altering the size of the clinic and other parameters may  
369 change the cost per additional adolescent utilising services.

370

371 This study was subject to a number of limitations. Firstly, we were unable to cost the non-  
372 modifiable preferences- although these produced the largest impact regarding uptake of services.  
373 Ideally, more work needs to be conducted to investigate ways to increase healthcare provider  
374 attitude. Behavioural economics informed interventions or nudges provide a potential way to  
375 influence provider attitude and behaviour (37). Studies that investigate possible costs and  
376 effectiveness of interventions that are geared towards improving provider attitudes towards  
377 adolescents and their access to HIV and contraceptive services would be required to effectively  
378 evaluate the cost-effectiveness of such interventions in this modeling framework. Second,  
379 projections from the DCE are theoretical as they are based on stated preferences as users are not  
380 observed (38). Results from DCEs have, however, been used in other studies to project uptake of  
381 services or products (31,39). A DCE forms a reliable evidence base for such projections. Third,  
382 our study does not look at the heterogeneity of preferences and therefore differentiated impact  
383 depending on the underlying population. Relative expected cost-effectiveness might differ based  
384 on the composition of the underlying population. A DCE conducted across multiple different  
385 underlying populations or in different geographies would address this limitation of the present  
386 application of this novel methodology.

387

388

389

## 390 **Conclusions**

391

392 Patient-centred care has been expounded as the ultimate goal of health care service provision but  
393 is rarely a reality. The work described here might provide an approach to meet that need whilst  
394 considering the resource limitations that often exist particularly in low-resource settings. Policy  
395 decision making requires consideration of both patient preferences and cost-effectiveness  
396 information our study utilizes the DCE methodology to infer both. In instances where funding or  
397 time do not allow, the proposed methodology provides one mechanism to understand the  
398 possible cost-effectiveness of different implementation scenarios. The results from this type of  
399 analysis can be useful in either guiding implementation- if no plan exists for further study- or  
400 could be used to guide study design for empirical cost-effectiveness studies. Follow up work  
401 could look at acceptability, feasibility, and effectiveness of interventions built from these  
402 scenarios on uptake of HIV services by young people in different settings.

403

404

405 **Word limit: 3500 words**

406

407 **Competing interests** [Mandatory]

408 The authors declare that they have no competing interests.

409

410

411 **Authors' contributions** [Mandatory]

412 CG and BEN conceptualized and designed the study. CGM conducted the analysis. CG prepared  
413 the original draft. CG, BEN, SP, LL, CAR and AM reviewed and edited the draft.

414

415 **Acknowledgements** [Mandatory]

416 **Funding:**

417 This study was made possible by the generous support of the American People and the  
418 President's Emergency Plan for AIDS Relief (PEPFAR) through US Agency for International  
419 Development (USAID) under the terms of Cooperative Agreements AID-674-A-12-00029 and  
420 72067419CA00004 to Health Economics and Epidemiology Research Office. LL was supported  
421 by the National Institute of Mental Health of the National Institutes of Health under grant  
422 number K01MH119923. The contents are the responsibility of the authors and do not necessarily  
423 reflect the views of the NIH, PEPFAR, USAID or the United States Government. The funders  
424 had no role in the study design, collection, analysis and interpretation of the data, in manuscript  
425 preparation or the decision to publish.

426

427 Disclaimer:

428

429 **Additional files** [Optional]

430 Additional file 1: Title of additional file

431 Information on file format. Brief description of file content.

432

433

434 **List of abbreviations** [Optional]

435

436 **References**

- 437 1. Smith P, Marcus R, Bennie T, Nkala B, Nchabeleng M, Latka MH, et al. What do South African  
438 adolescents want in a sexual health service? Evidence from the South African studies on HIV in  
439 adolescents (SASHA) project. *South African Med J* [Internet]. 2018 [cited 2021 May  
440 23];108(8):677–81. Available from:  
441 [http://www.scielo.org.za/scielo.php?script=sci\\_arttext&pid=S0256-](http://www.scielo.org.za/scielo.php?script=sci_arttext&pid=S0256-95742018000800020&lng=en&nrm=iso&tlng=en)  
442 [95742018000800020&lng=en&nrm=iso&tlng=en](http://www.scielo.org.za/scielo.php?script=sci_arttext&pid=S0256-95742018000800020&lng=en&nrm=iso&tlng=en)
- 443 2. Interventions for preventing unintended pregnancies among adolescents | Davids | South African  
444 Medical Journal [Internet]. [cited 2021 May 23]. Available from:  
445 <http://www.samj.org.za/index.php/samj/article/view/12818/9086>
- 446 3. Ajayi AI, Ezegbe HC. Association between sexual violence and unintended pregnancy among  
447 adolescent girls and young women in South Africa. *BMC Public Health*. 2020;20(1):1–10.
- 448 4. Unaid. Women and HIV — A spotlight on adolescent girls and young women.
- 449 5. Africa S. Demographic and Health Survey 2016 Key Findings [Internet]. [cited 2021 Jul 4].  
450 Available from: [www.DHSprogram.com](http://www.DHSprogram.com).
- 451 6. Integrated School Health Policy.
- 452 7. Mendelsohn AS, Gill K, Marcus R, Robbertze D, Van de Venter C, Mendel E, et al. Sexual  
453 reproductive healthcare utilisation and HIV testing in an integrated adolescent youth centre clinic  
454 in Cape Town, South Africa. *South Afr J HIV Med*. 2018 Nov 26;19(1).
- 455 8. Africa R of S. Children’s Act, 2005. *Gov Gaz*. 2006;492(28944):48.
- 456 9. Tylee A, Haller DM, Graham T, Churchill R, Sanci LA. Youth-friendly primary-care services:  
457 how are we doing and what more needs to be done? [Internet]. Vol. 369, *Lancet*. *Lancet*; 2007  
458 [cited 2020 Sep 16]. p. 1565–73. Available from: <https://pubmed.ncbi.nlm.nih.gov/17482988/>
- 459 10. Abebe M, Awoke W. Utilization of Youth Reproductive Health Services and Associated Factors  
460 among High School Students in Bahir Dar, Amhara Regional State, Ethiopia. *Open J Epidemiol*.

- 461 2014;04(02):69–75.
- 462 11. Robert K, Maryline M, Jordan K, Lina D, Helgar M, Annrita I, et al. Factors influencing access of  
463 HIV and sexual and reproductive health services among adolescent key populations in Kenya. *Int J*  
464 *Public Health* [Internet]. 2020 May 1 [cited 2022 May 9];65(4):425. Available from:  
465 [/pmc/articles/PMC7275021/](https://pubmed.ncbi.nlm.nih.gov/34811111/)
- 466 12. Using Discrete Choice Experiments to Value Health and Health Care - Google Books [Internet].  
467 [cited 2021 May 23]. Available from:  
468 [https://books.google.co.za/books?hl=en&lr=&id=a7PsKL4rfksC&oi=fnd&pg=PR7&ots=eIDi8G9](https://books.google.co.za/books?hl=en&lr=&id=a7PsKL4rfksC&oi=fnd&pg=PR7&ots=eIDi8G90I6&sig=UlaB5iikE2aCREFbMaJ7LXrKjaE&redir_esc=y#v=onepage&q&f=false)  
469 [0I6&sig=UlaB5iikE2aCREFbMaJ7LXrKjaE&redir\\_esc=y#v=onepage&q&f=false](https://books.google.co.za/books?hl=en&lr=&id=a7PsKL4rfksC&oi=fnd&pg=PR7&ots=eIDi8G90I6&sig=UlaB5iikE2aCREFbMaJ7LXrKjaE&redir_esc=y#v=onepage&q&f=false)
- 470 13. Soekhai V, de Bekker-Grob EW, Ellis AR, Vass CM. Discrete Choice Experiments in Health  
471 Economics: Past, Present and Future. *Pharmacoeconomics* [Internet]. 2019 Feb 3 [cited 2021 May  
472 23];37(2):201–26. Available from: <http://link.springer.com/10.1007/s40273-018-0734-2>
- 473 14. Lancsar E, Louviere J. Conducting discrete choice experiments to inform healthcare decision  
474 making: A user’s guide [Internet]. Vol. 26, *PharmacoEconomics*. *Pharmacoeconomics*; 2008  
475 [cited 2021 May 23]. p. 661–77. Available from: <https://pubmed.ncbi.nlm.nih.gov/18620460/>
- 476 15. Govathson C, Long L, Moolla A, Mngadi-Ncube S, Ngcobo N, Mongwenyana C, et al. School-  
477 going learners are more likely to access HIV and contraceptive care at locations with friendly  
478 providers, Wi-Fi and other value-added services: Findings from a discrete choice experiment  
479 among learners in Gauteng, South Africa. *medRxiv* [Internet]. 2022 Jul 15 [cited 2022 Sep  
480 4];2022.07.13.22277459. Available from:  
481 <https://www.medrxiv.org/content/10.1101/2022.07.13.22277459v1>
- 482 16. Ostermann J, Njau B, Hobbie A, Mtuy T, Masaki ML, Shayo A, et al. Using discrete choice  
483 experiments to design interventions for heterogeneous preferences: protocol for a pragmatic  
484 randomised controlled trial of a preference-informed, heterogeneity-focused, HIV testing offer for  
485 high-risk populations. *BMJ Open* [Internet]. 2020 Nov 1 [cited 2021 Oct 21];10(11):e039313.  
486 Available from: <https://bmjopen.bmj.com/content/10/11/e039313>
- 487 17. Terris-Prestholt F, Quaife M, Vickerman P. PARAMETERISING USER UPTAKE IN  
488 ECONOMIC EVALUATIONS: THE ROLE OF DISCRETE CHOICE EXPERIMENTS. 2016;
- 489 18. Uzoaru F, Nwaozuru U, Ong JJ, Obi F, Obiezu-Umeh C, Tucker JD, et al. Costs of implementing  
490 community-based intervention for HIV testing in sub-Saharan Africa: a systematic review.

- 491 Implement Sci Commun 2021 21 [Internet]. 2021 Jul 5 [cited 2021 Oct 21];2(1):1–21. Available  
492 from: [https://implementationsciencecomms.biomedcentral.com/articles/10.1186/s43058-021-](https://implementationsciencecomms.biomedcentral.com/articles/10.1186/s43058-021-00177-y)  
493 00177-y
- 494 19. Fernandez ME, ten Hoor GA, van Lieshout S, Rodriguez SA, Beidas RS, Parcel G, et al.  
495 Implementation Mapping: Using Intervention Mapping to Develop Implementation Strategies.  
496 Front Public Heal. 2019;0(JUN):158.
- 497 20. Pascoe, Sophie JS, Govathson C, Sithabile M, Moolla, Aneesa, Mongwenyana C, Ngcobo N, et al.  
498 How do we tailor services to meet young people’s needs? A discrete choice experiment to  
499 determine preferences of high school students in Gauteng for accessing HIV and contraceptive  
500 services. In: AIDS 2020. 2020.
- 501 21. Rockers P, Ryan M, Kolstad JR, Dolea C. How to conduct a discrete choice experiment for health  
502 workforce recruitment and retention in remote and rural areas □: a user guide with case studies.  
503 undefined. 2012;
- 504 22. Long LC, Girdwood SJ, Govender K, Lekodeba N, Meyer-Rath G, Miot J. Leveraging private  
505 providers to improve and extend HIV treatment access in South Africa: Cost implications for  
506 Universal Health Care in South Africa. In.
- 507 23. Long LC. Cost and Outcomes of Routine HIV Care and Treatment: Public and Private Service  
508 Delivery Models Covering Low-Income Earners in South Africa. 2021 [cited 2022 Jun 17];  
509 Available from: <https://doi.org/10.21203/rs.3.rs-960517/v1>
- 510 24. Girdwood S, Govender K, Long L, Miot J, Meyer-Rath G. Primary healthcare delivery models for  
511 uninsured low-income earners during the transition to National Health Insurance: Perspectives of  
512 private South African providers. S Afr Med J. 2019;109(10):771–83.
- 513 25. PROJECT ISIZWE PROVIDING PUBLIC WI-FI ACCESS IN SOUTH AFRICA.
- 514 26. Devereux S, Hochfeld T, Karriem A, Mensah C, Morahanye M, Msimango T, et al. Food Security  
515 SA Working Paper Series: #004 School Feeding in South Africa. [cited 2022 Jun 17]; Available  
516 from: [www.foodsecurity.ac.za](http://www.foodsecurity.ac.za)
- 517 27. Selected Historical Rates [Internet]. [cited 2022 Jun 5]. Available from:  
518 <https://www.resbank.co.za/en/home/what-we-do/statistics/key-statistics/selected-historical-rates>
- 519 28. Mauskopf J, Rutten F, Schonfeld W. Cost-Effectiveness League Tables: Valuable Guidance for

- 520 Decision Makers? [Internet]. Vol. 21, *PharmacoEconomics*. Springer; 2003 [cited 2021 May 23].  
521 p. 991–1000. Available from: [https://link.springer.com/article/10.2165/00019053-200321140-](https://link.springer.com/article/10.2165/00019053-200321140-00001)  
522 00001
- 523 29. Cost-Effectiveness Frontier - YHEC - York Health Economics Consortium [Internet]. [cited 2021  
524 May 24]. Available from: <https://yhec.co.uk/glossary/cost-effectiveness-frontier/>
- 525 30. Using Discrete Choice Models with Experimental Design Data to Forecast Consumer Demand for  
526 a Unique Cultural Event on JSTOR [Internet]. [cited 2021 May 26]. Available from:  
527 <https://www.jstor.org/stable/2488807?seq=1>
- 528 31. Quaife M, Terris-Prestholt F, Di Tanna GL, Vickerman P. How well do discrete choice  
529 experiments predict health choices? A systematic review and meta-analysis of external validity.  
530 *Eur J Heal Econ* [Internet]. 2018 Nov 1 [cited 2021 May 23];19(8):1053–66. Available from:  
531 <https://pubmed.ncbi.nlm.nih.gov/29380229/>
- 532 32. Vickerman P, Quaife M, Kilbourne-Brook M, Mvundura M, Eakle R, Terris-Prestholt F. HIV  
533 prevention is not all about HIV - Using a discrete choice experiment among women to model how  
534 the uptake and effectiveness of HIV prevention products may also rely on pregnancy and STI  
535 protection. *BMC Infect Dis* [Internet]. 2020 Sep 25 [cited 2021 May 26];20(1):1–11. Available  
536 from: <https://doi.org/10.1186/s12879-020-05399-4>
- 537 33. Chilinda I, Hourahane G, Pindani M, Chitsulo C, Maluwa A. Attitude of Health Care Providers  
538 towards Adolescent Sexual and Reproductive Health Services in Developing Countries: A  
539 Systematic Review. 2014;(March 2021).
- 540 34. Black S, Wallace M, Middelkoop K, Robbertze D, Bennie T, Wood R, et al. Improving HIV  
541 testing amongst adolescents through an integrated Youth Centre rewards program: Insights from  
542 South Africa. *Child Youth Serv Rev*. 2014;45(C):98–105.
- 543 35. Stellenberg EL. Accessibility, affordability and use of health services in an urban area in South  
544 Africa. *Curationis* [Internet]. 2015 Mar 10 [cited 2021 May 26];38(1):1–7. Available from:  
545 <http://www.curationis.org.za>
- 546 36. Tylee A, Haller DM, Graham T, Churchill R, Sanci LA. Youth-friendly primary-care services:  
547 how are we doing and what more needs to be done? [Internet]. Vol. 369, *Lancet*. Elsevier B.V.;  
548 2007 [cited 2021 May 26]. p. 1565–73. Available from:  
549 <http://www.thelancet.com/article/S0140673607603717/fulltext>

- 550 37. Wang SY, Groene O. The effectiveness of behavioral economics-informed interventions on  
551 physician behavioral change: A systematic literature review. PLoS One. 2020 Jun  
552 4;15(6):e0234149.
- 553 38. de Corte K, Cairns J, Grieve R. Stated versus revealed preferences: An approach to reduce bias.  
554 Heal Econ (United Kingdom). 2021;30(5):1095–123.
- 555 39. Schaffer EM, Gonzalez JM, Wheeler SB, Kwarisiima D, Chamie G, Thirumurthy H. Promoting  
556 HIV Testing by Men: A Discrete Choice Experiment to Elicit Preferences and Predict Uptake of  
557 Community-based Testing in Uganda. Appl Health Econ Health Policy [Internet].  
558 2020;18(3):413–32. Available from: <https://doi.org/10.1007/s40258-019-00549-5>
- 559



## Sites

- South African non-profit organization providing Comprehensive PHC services provided by nurses and doctors. DOH support- Accesses public-sector drugs and laboratory tests.
- Government, primary health clinic (PHC)

Sites reported similar mean age, days in care, and number of visits.

## Costing

- Resource use was calculated from the perspective of the provider, the public health system.
- All costs were updated to 2019 public-sector prices and salaries

### Summary of costs, assumptions and sources of cost data for each scenario

| Cost categories                                                                                 | Methods                                                                                                                                                     | Assumptions                                                                                                                                                                                                                              | Source                                   |
|-------------------------------------------------------------------------------------------------|-------------------------------------------------------------------------------------------------------------------------------------------------------------|------------------------------------------------------------------------------------------------------------------------------------------------------------------------------------------------------------------------------------------|------------------------------------------|
| Total PHC headcounts were calculated using monthly headcounts over a period of 12 months (2018) |                                                                                                                                                             |                                                                                                                                                                                                                                          |                                          |
| <b>Staff (clinical and non-clinical)</b>                                                        | top-down approach for staff                                                                                                                                 | Additional youths would bear the cost of all additional staff at the facility as a result of intervention                                                                                                                                | Data collected for Long et al(1)         |
| <b>Consumables/supplies</b>                                                                     | Top-down. Calculated using monthly expenditure on supplies. This was shared among all PHC patients. (Total spent on consumables/total number of patients).  | Maintained the per patient cost of consumables at the clinic level for the new youth patients obtained.                                                                                                                                  | Data collected for Long et al(1)         |
| <b>Overheads</b>                                                                                | Overhead costs were calculated through a top-down approach. Additional overhead costs, i.e. extra space for youth only were all shared by additional youth. | Separate space the size of a single counselling room at the facility was allocated for youth only services.<br><br>Overheads were calculated by multiplying total overhead expenditure by proportion of new youths over total PHC count. | Data collected for Long et al(1)         |
| <b>Assets</b>                                                                                   | Bottom up inventory of all assets in clinic and shared among all patients.                                                                                  | Shared the total cost of assets amongst all patients as no new assets would be necessary for intervention.                                                                                                                               | Data collected for Long et al(1)         |
| <b>WIFI</b>                                                                                     |                                                                                                                                                             | <b>WIFI</b> - Project Isizwe (Free WIFI for Tshwane clinics average costs). Costs of supply to a clinic for 1 month shared by all youths.                                                                                                | Data collected for Long et al(1) and (2) |

|                        |  |                                                                                                                                            |                       |
|------------------------|--|--------------------------------------------------------------------------------------------------------------------------------------------|-----------------------|
| <b>Subsidized food</b> |  | All youth presenting received subsidised food but additional youths bore the cost. A total of ZAR 10 was cost for each adolescent patient. | <b>Costs from (3)</b> |
|------------------------|--|--------------------------------------------------------------------------------------------------------------------------------------------|-----------------------|

#### References

1. Long LC. Cost and Outcomes of Routine HIV Care and Treatment: Public and Private Service Delivery Models Covering Low-Income Earners in South Africa. 2021 [cited 2022 Jun 17]; Available from: <https://doi.org/10.21203/rs.3.rs-960517/v1>
2. PROJECT ISIZWE PROVIDING PUBLIC WI-FI ACCESS IN SOUTH AFRICA.
3. Devereux S, Hochfeld T, Karriem A, Mensah C, Morahanye M, Msimango T, et al. Food Security SA Working Paper Series: #004 School Feeding in South Africa. [cited 2022 Jun 17]; Available from: [www.foodsecurity.ac.za](http://www.foodsecurity.ac.za)
